# Supplementary material for: Hydrothermal synthesis of water-soluble Mn- and Cu-doped CdSe quantum dots with multi-shell structures and their photoluminescence properties
Source: Royal Society of Chemistry journal article supplement (doi:10.1039/d1ra08491g), 2022-01-01
Supplement: d1ra08491g1.pdf [file d1ra08491g1.pdf]

## **Supporting Information**

### **Hydrothermal synthesis of water-soluble Mn- and Cu-doped CdSe quantum dots with multi-shell structures and their photoluminescence properties**

Hisaaki Nishimura <sup>a</sup>, Kazushi Enomoto <sup>b</sup>, Yong-Jin Pu <sup>b</sup> and DaeGwi Kim\*<sup>a</sup>

<sup>a</sup>Department of Applied Physics, Osaka City University, Osaka 558-8585, Japan

<sup>b</sup>RIKEN Center for Emergent Matter Science (CEMS), Saitama 351-0198, Japan

\* e-mail: [tegi@a-phy.eng.osaka-cu.ac.jp](mailto:tegi@a-phy.eng.osaka-cu.ac.jp)

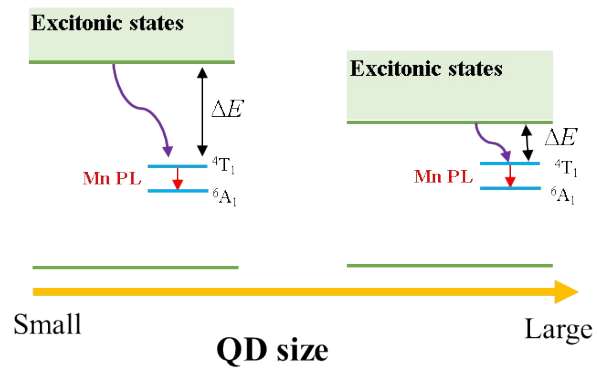

Fig. S1 Sketch of the variation of the energy gap between the <sup>4</sup>T<sub>1</sub> state of the Mn<sup>2+</sup> dopants and the excitonic states:  $\Delta E$  with the change in the QD size of the CdSe-core. [1]

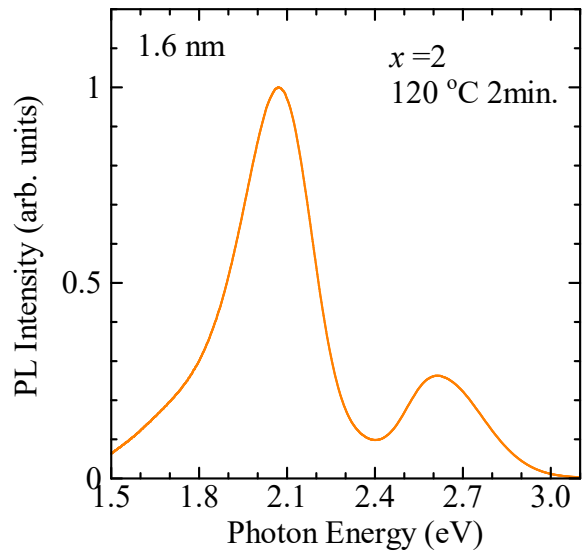

Fig. S2 PL spectra of CdSe/ZnS:Mn/ZnS QDs prepared under the same conditions as in ref. [2].

•How to fabricate ZnS:Mn shell layer

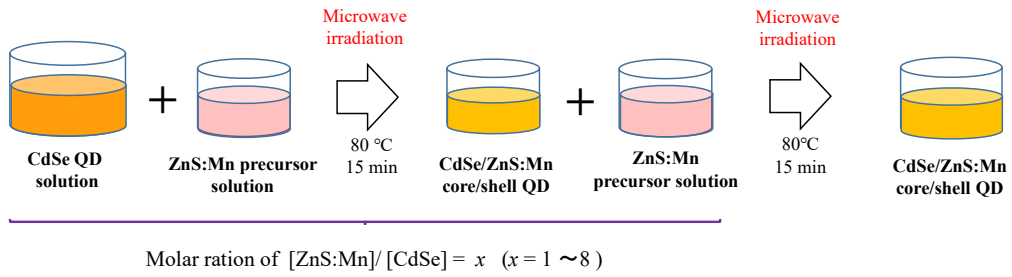

•How to fabricate ZnS shell layer

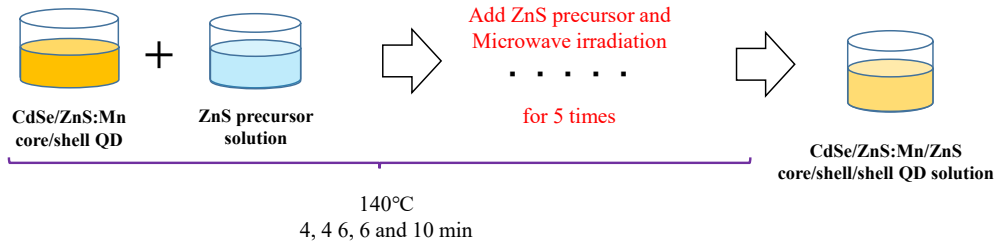

Fig. S3 Synthesis scheme of the CdSe/ZnS:Mn/ZnS QDs.

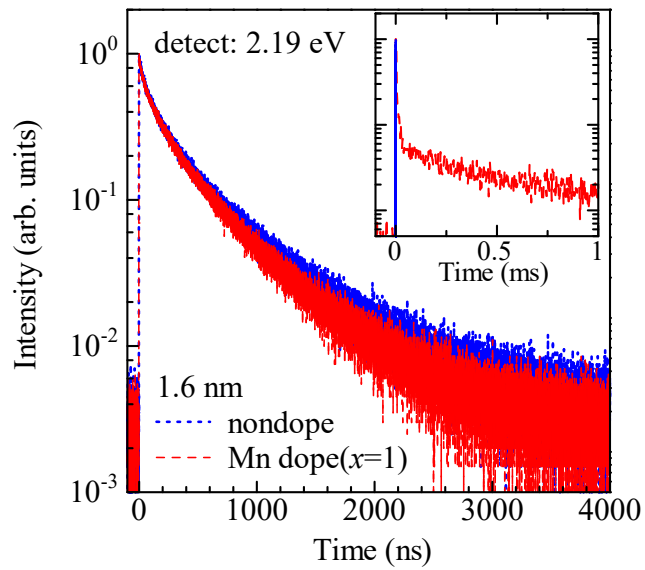

Fig. S4 PL decay profiles of CdSe/ZnS:Mn/ZnS QDs ( $x=1$ ) and non-doped CdSe/ZnS QDs detected at 2.19 eV. The inset shows the decay profiles with the time scale in milliseconds.

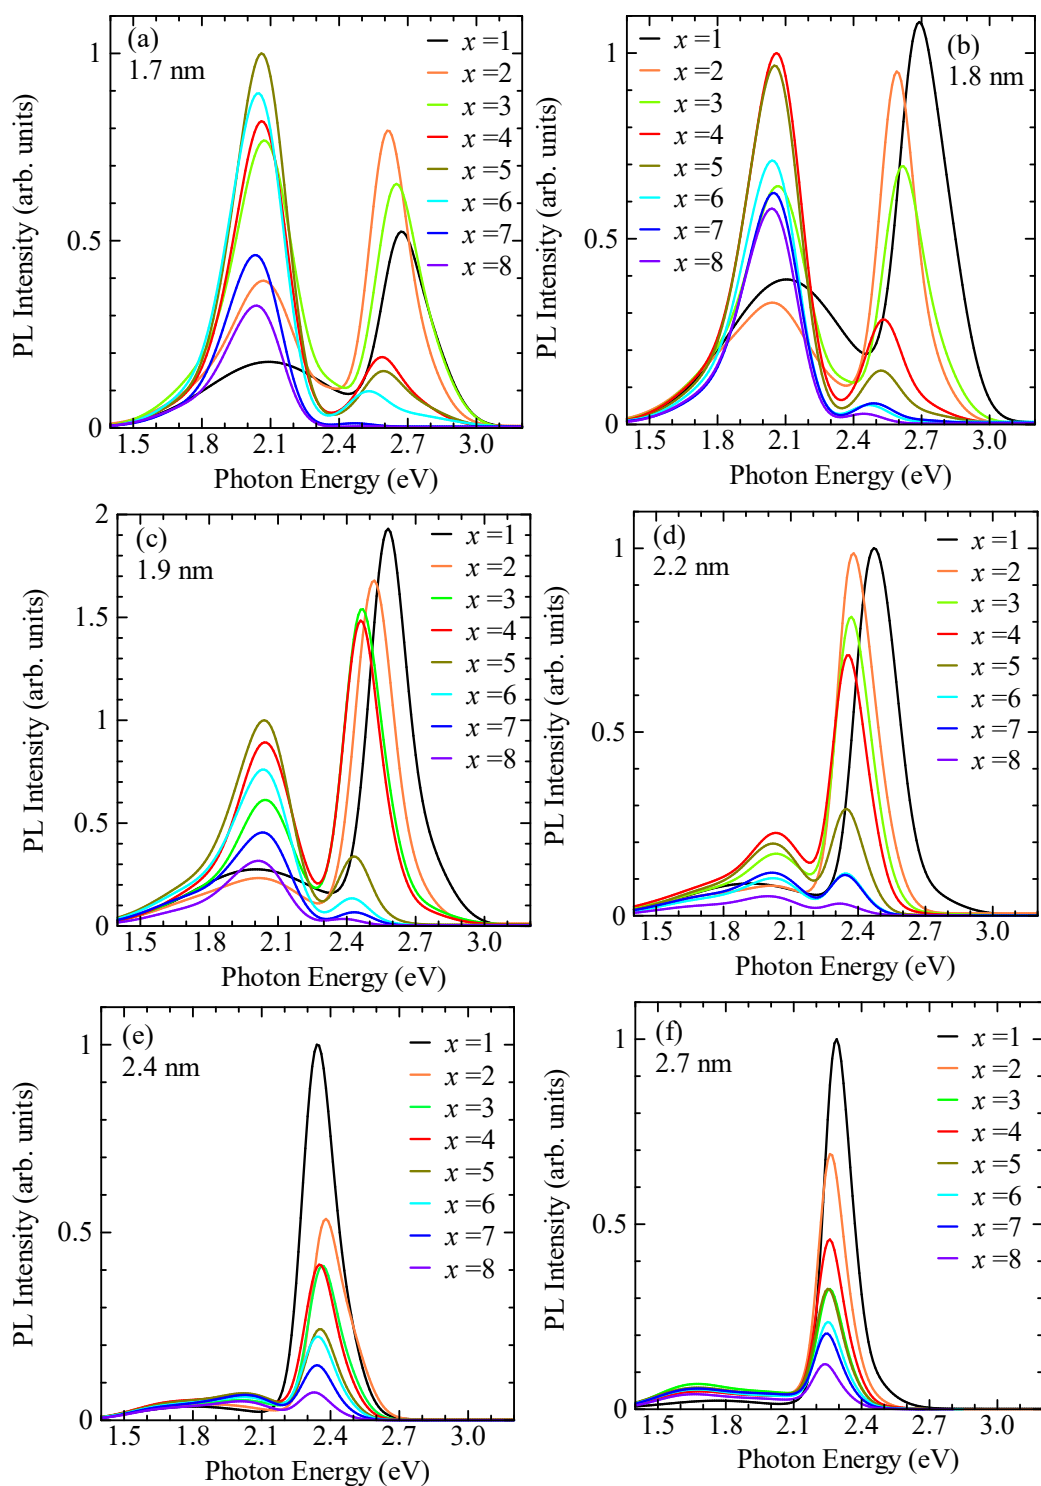

Fig. S5 PL spectra of CdSe/ZnS:Mn/ZnS QDs synthesized with different Mn preparation concentration at each QD size.

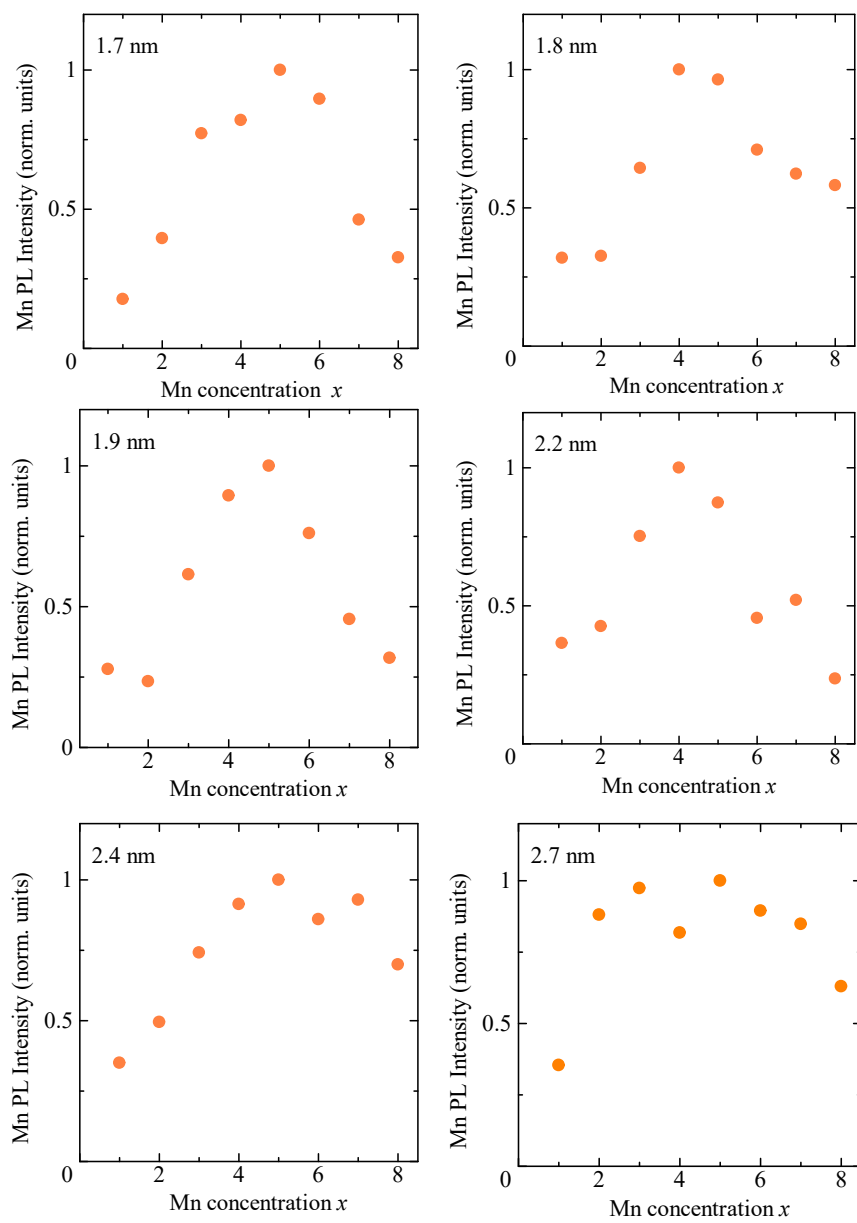

Fig. S6 Mn preparation concentration dependence of the CdSe/ZnS:Mn/ZnS QDs at each QD size.

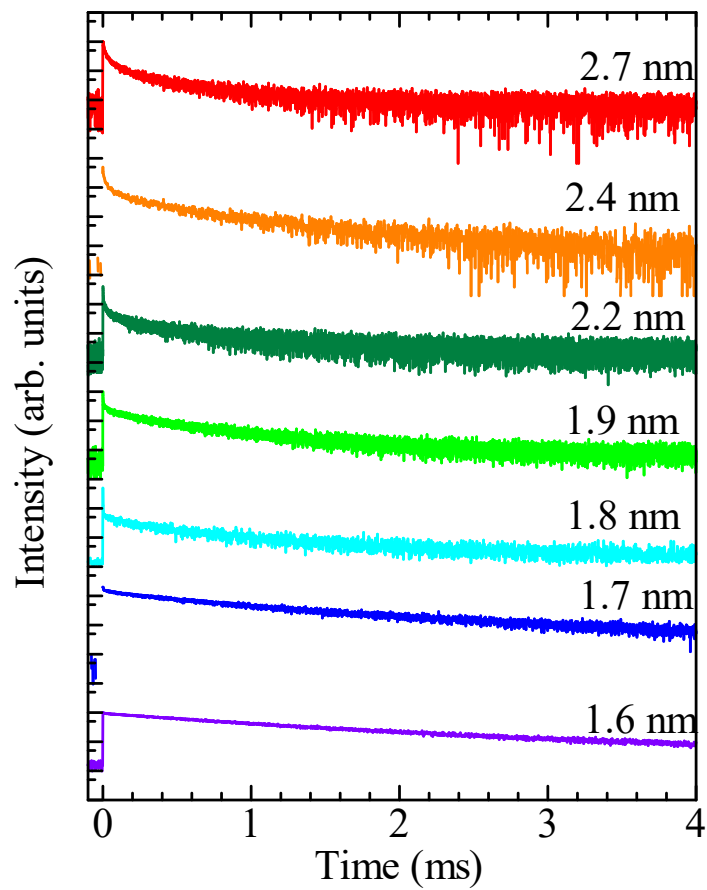

Fig. S7 PL decay profiles of the Mn-PL bands for each QDs.



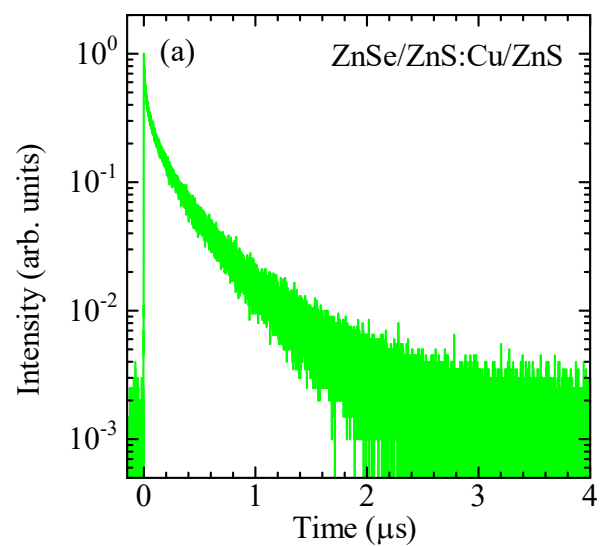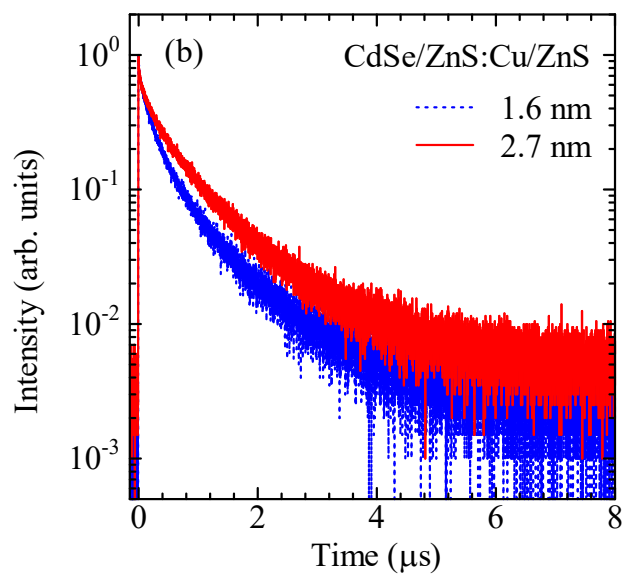

Fig. S8 PL decay profiles of Cu-doped QDs. (a) PL decay profile of the ZnSe/ZnS:Cu/ZnS QDs detected at 2.6 eV. (b) PL decay profiles of the CdSe/ZnS:Cu/ZnS QDs using the CdSe-core QDs with  $d = 1.6$  (blue line) and 2.7 nm (red line) detected at 1.9 eV and 1.5 eV, respectively.

## References

[1] R. Beaulac, P. I. Archer, X. Y. Liu, S. Lee, G. M. Salley, M. Dobrowolska, J. K. Furdyna and D. R. Gamelin, *Nano Lett.*, 2008, **8**, 1197–1201.

[2] H. Nishimura, T. Maekawa, K. Enomoto, N. Shigekawa, T. Takagi, S. Sobue, S. Kawai and D. Kim, *J. Mater. Chem. C*, **9**, 693-701.
